# Supplementary material
Source: PubMed Central journal article supplement (PMC4739686)

# Fig. S1

## A

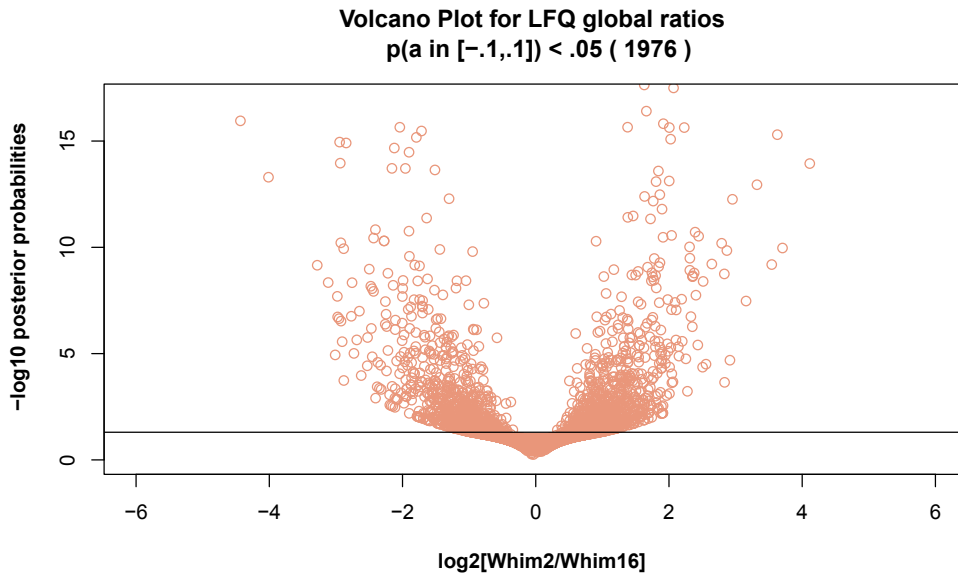

## B

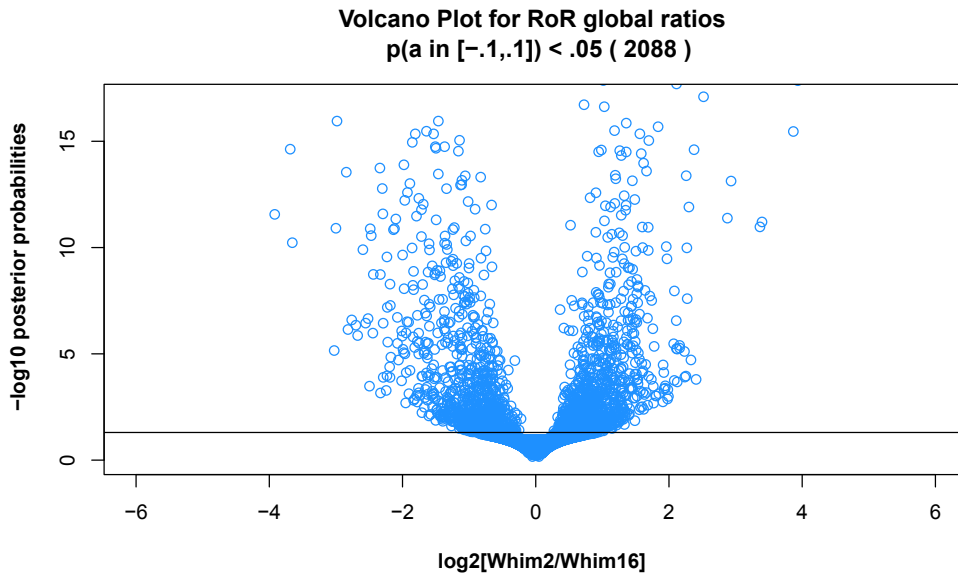

## C

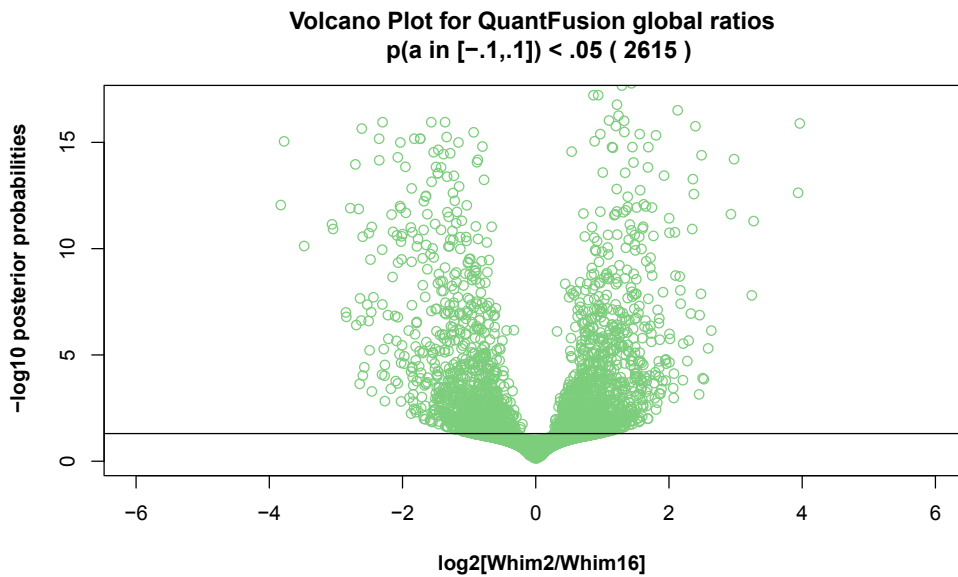

Supplement: 10.1074_O115.049791_mcp.O115.049791-8.pdf [file 10.1074_O115.049791_mcp.O115.049791-8.pdf]

# Fig. S2

**Probability of Detecting Actual Fold Changes**  
Prediction Errors: LFQ = 0.59 , RoR = 0.41 , Unified = 0.46

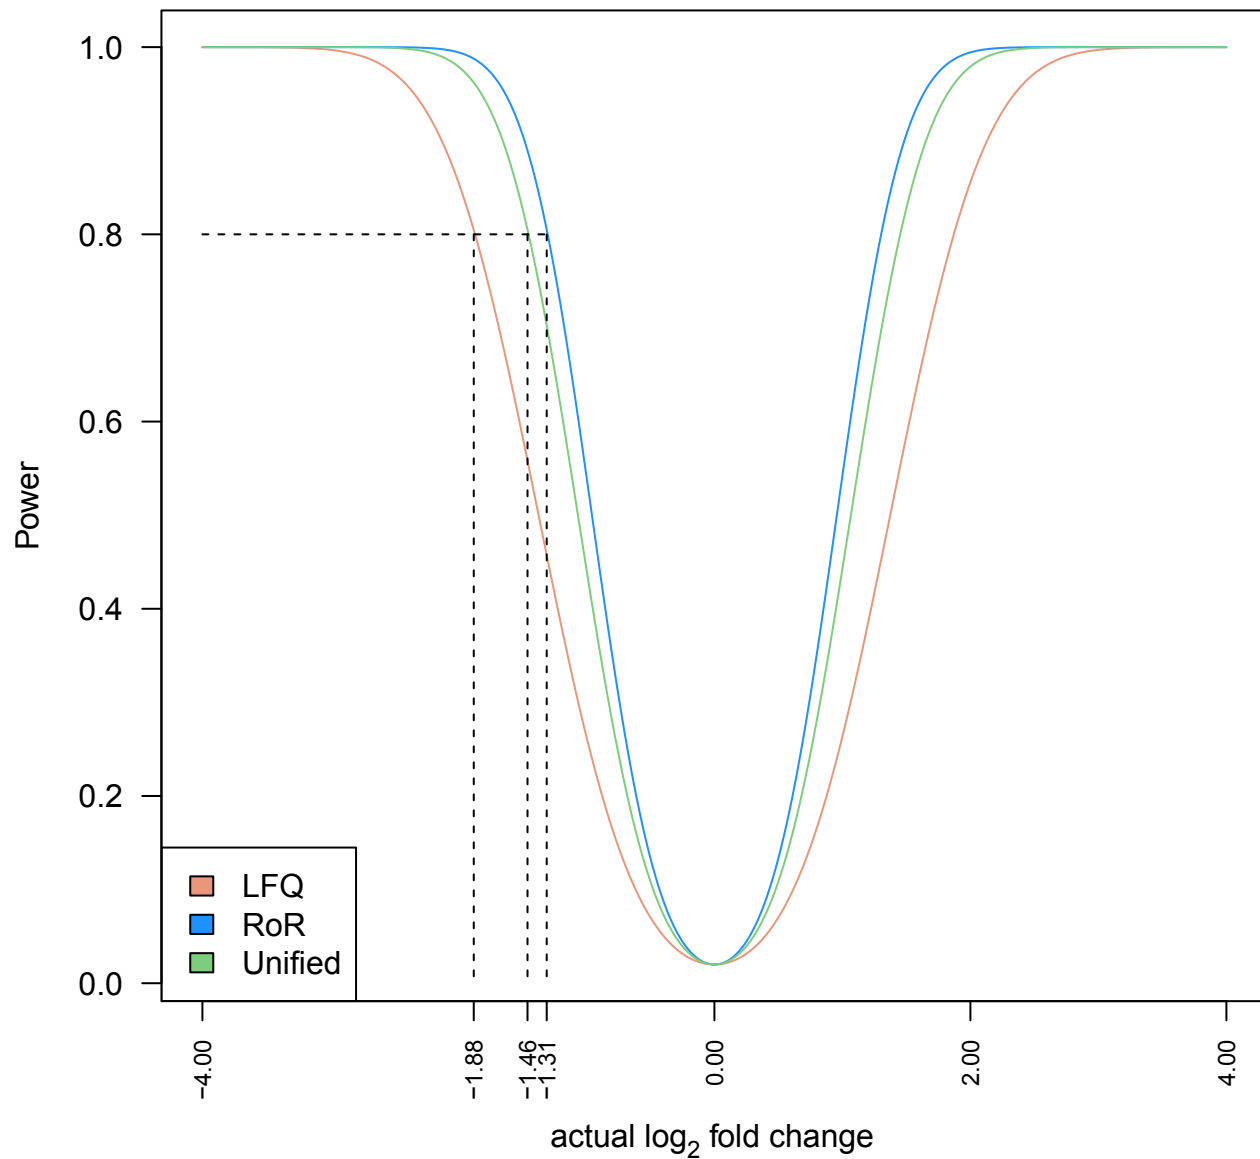

Supplement: 10.1074_O115.049791_mcp.O115.049791-9.pdf [file 10.1074_O115.049791_mcp.O115.049791-9.pdf]
